# Supplementary material
Source: PubMed Central journal article supplement (PMC8221844)
Supplement: 10-1055-s-0041-1730032-s200298cr.pdf [file 10-1055-s-0041-1730032-s200298cr.pdf]

**Supplementary Appendix A: List and descriptions of all facilities in sample of clinical consent forms**

| Facility name                                               | City             | State          | Identification strategy | Form count |
|-------------------------------------------------------------|------------------|----------------|-------------------------|------------|
| Acute care hospitals                                        |                  |                |                         |            |
| Bon Secours St Mary's Hospital                              | Richmond         | Virginia       | RAND                    | 2          |
| Boston Medical Center                                       | Boston           | Massachusetts  | CTSA                    | 1          |
| Cape Fear Valley Health Hoke Hospital                       | Raeford          | North Carolina | RAND                    | 1          |
| Columbia University Irving Medical Center                   | New York         | New York       | CTSA                    | 1          |
| Doctors' Community Hospital                                 | Lanham           | Maryland       | RAND                    | 1          |
| Emory Healthcare                                            | Atlanta          | Georgia        | CTSA                    | 1          |
| GHS Laurens County Memorial Hospital                        | Clinton          | South Carolina | RAND                    | 1          |
| Hospital of The University of Pennsylvania                  | Philadelphia     | Pennsylvania   | CTSA                    | 1          |
| Indiana University Health                                   | Indianapolis     | Indiana        | CTSA, RAND              | 3          |
| Indiana University Health Arnett Hospital                   | Lafayette        | Indiana        | RAND                    | 1          |
| Intermountain Medical Center                                | Murray           | Utah           | RAND                    | 3          |
| Johns Hopkins Health System                                 | Baltimore        | Maryland       | CTSA                    | 1          |
| Hospital A                                                  | –                | Michigan       | MHIMA                   | 1          |
| Mayo Clinic Health System Franciscan Med Ctr                | La Crosse        | Wisconsin      | RAND                    | 1          |
| Mayo Clinic Rochester                                       | Rochester        | Minnesota      | CTSA, RAND              | 1          |
| Hospital B                                                  | –                | Michigan       | MHIMA                   | 3          |
| Montefiore Medical Center                                   | Bronx            | New York       | CTSA                    | 1          |
| Mount Carmel New Albany Surgical Hospital                   | New Albany       | Ohio           | RAND                    | 1          |
| Mount St Mary's Hospital and Health Center                  | Lewiston         | New York       | RAND                    | 1          |
| MUSC Medical Center of Medical University of South Carolina | Charleston       | South Carolina | CTSA                    | 1          |
| North Austin Medical Center                                 | Austin           | Texas          | RAND                    | 2          |
| Northwestern Memorial Hospital                              | Chicago          | Illinois       | CTSA                    | 2          |
| OHSU Hospital                                               | Portland         | Oregon         | CTSA                    | 5          |
| Piedmont Athens Regional Medical Center                     | Athens           | Georgia        | RAND                    | 1          |
| Piedmont Rockdale Hospital                                  | Conyers          | Georgia        | RAND                    | 1          |
| St Bernard's Medical Center                                 | Jonesboro        | Arkansas       | RAND                    | 2          |
| St Lucie Medical Center                                     | Port Saint Lucie | Florida        | RAND                    | 2          |
| St Luke's Des Peres Hospital                                | Saint Louis      | Missouri       | RAND                    | 1          |
| Hospital C                                                  | –                | Michigan       | MHIMA                   | 13         |
| Strong Memorial Hospital                                    | Rochester        | New York       | CTSA, RAND              | 16         |
| SUNY Downstate Medical Center University Hospital           | Brooklyn         | New York       | CTSA                    | 1          |
| ThedaCare Regional Medical Center - Neenah Inc              | Neenah           | Wisconsin      | RAND                    | 1          |
| UC Health                                                   | Cincinnati       | Ohio           | CTSA                    | 1          |
| UC San Diego Health Hillcrest - Hillcrest Med Ctr           | San Diego        | California     | CTSA                    | 1          |
| UF Health Shands Hospital                                   | Gainesville      | Florida        | CTSA                    | 1          |
| UNC Health Care System                                      | Chapel Hill      | North Carolina | CTSA                    | 3          |
| University of California Davis Medical Center               | Sacramento       | California     | CTSA                    | 2          |
| University of Iowa Hospitals and Clinics                    | Iowa City        | Iowa           | CTSA                    | 3          |

(Continued)

| Facility name                                      | City            | State                | Identification strategy | Form count |
|----------------------------------------------------|-----------------|----------------------|-------------------------|------------|
| University of Kansas Hospital                      | Kansas City     | Kansas               | CTSA                    | 1          |
| University of Kentucky Albert B. Chandler Hospital | Lexington       | Kentucky             | CTSA                    | 1          |
| University of Miami Health System                  | Miami           | Florida              | CTSA                    | 1          |
| Hospital D                                         | –               | Michigan             | MHIMA, RAND             | 16         |
| University Of New Mexico Hospitals                 | Albuquerque     | New Mexico           | CTSA                    | 1          |
| UPMC                                               | Pittsburgh      | Pennsylvania         | CTSA                    | 1          |
| UT Southwestern University Hospital-Zale Lipshy    | Dallas          | Texas                | CTSA                    | 1          |
| VCU Medical Center                                 | Richmond        | Virginia             | CTSA                    | 2          |
| Wellstar Cobb Hospital                             | Austell         | Georgia              | RAND                    | 3          |
| Yale-New Haven Health System                       | New Haven       | Connecticut          | CTSA                    | 1          |
| Children's hospitals                               |                 |                      |                         |            |
| Children's National Health System                  | Washington      | District of Columbia | CTSA                    | 1          |
| Critical access hospitals                          |                 |                      |                         |            |
| CHI St Alexius Health Williston                    | Williston       | North Dakota         | RAND                    | 2          |
| Christus Mother Frances Hospital- Winnsboro        | Winnsboro       | Texas                | RAND                    | 2          |
| Pinckneyville Community Hospital                   | Pinckneyville   | Illinois             | RAND                    | 1          |
| UHHS Memorial Hospital of Geneva                   | Geneva          | Ohio                 | RAND                    | 1          |
| Psychiatric hospitals                              |                 |                      |                         |            |
| Pacific Grove Hospital                             | Riverside       | California           | RAND                    | 1          |
| Springfield Hospital Center                        | Sykesville      | Maryland             | RAND                    | 1          |
| Windhaven Psychiatric Hospital                     | Prescott Valley | Arizona              | RAND                    | 1          |
| Ambulatory surgical centers                        |                 |                      |                         |            |
| Chambersburg Endoscopy Center LLC                  | Chambersburg    | Pennsylvania         | RAND                    | 3          |
| CSA Surgical Center LLC                            | Columbia        | Missouri             | RAND                    | 2          |
| Georgia Lithotripsy and Laser Center               | Athens          | Georgia              | RAND                    | 2          |
| Gwinnett Endoscopy Center Pc                       | Lawrenceville   | Georgia              | RAND                    | 2          |
| Hamilton Surgical Center Inc.                      | Hamilton        | New Jersey           | RAND                    | 1          |
| Spivey Station Surgery Center                      | Jonesboro       | Georgia              | RAND                    | 1          |

Key: MHIMA = Direct Contribution from Michigan Health Information Management Association members; RAND = Randomly Selected and Systematic Web Search; CTSA = 1:1 Match with 2014–2018 Clinical and Translational Science Awards Hubs and Systematic Web Search.

Note: Sites and forms may have been discovered through >1 identification strategy.

Note: Sites and forms may have been discovered through >1 identification strategy. Forms from Hospitals A, B, C, and D were collected via direct contribution from MHIMA members. Facility names and locations are not provided in this table and forms are not published online per agreement with MHIMA sites.

## Supplementary Appendix B: Annotation Scheme and Guidelines for Permissions in Clinical Consent Forms

### Purpose

The purpose of this document is to describe annotation criteria so that human annotators can identify permissions in the provided texts (i.e., consent forms).

### Definition

For purposes of this project, we define a permission as statement(s) that, upon signature of the consent form, authorizes any new action or activity that may, must, or must not be done.

- We are **NOT** interested in permissions for payment or hospital operations. Do not annotate these permissions.

### Login and Technical Instructions

1. Navigate to [DataTurks](#) and Login.
2. On the “My Projects” page, click on the project that you intend to work on (see project names under each annotation round below).
3. On the project’s dashboard, click “Start Tagging.”
4. You will be directed to eligible texts for annotation. Follow the corresponding instructions (below) for each annotation round.

### Identifying Relevant Permissions (and Confidence)

1. Open your DataTurks Project.
2. Read the entirety of the consent form. Do not mark up any text.
3. Read through the form again. Highlight the sentence(s) which contain permission(s), selecting a label corresponding with your confidence that it is a permission:
  - **Positive: I am certain that this is a permission.**
  - **Indeterminate: This may be a permission.**

### Notes

For all annotations, highlight the entire sentence(s) from the first non-whitespace character to the last punctuation character.

- If there is no end punctuation, you may need to assume its presence.
- If statements indicate free text entry, highlight to the end of the text entry space (e.g., line \_\_\_) if visible in the .txt file (do not highlight trailing hard returns or white space).

There are various configurations of permissions and sentences:

- If a sentence contains a single permission, highlight that sentence once.
- If a sentence contains multiple permitted actions/activities, highlight the entire sentence once.
- If sequential sentences contain different permissions, highlight them separately.

Do not annotate permissions related to payment or hospital operations (e.g., insurance, contact).

4. Read through the form again. Verify all annotations.
5. Once you have completed all annotations on a text, click “Move to Done” at the bottom of the page (or ctrl + entr). Or, if you want to revisit a text before submitting it as done, click “Skip” at the bottom of the page (or ctrl + q).
